# Supplementary material for: Sustainable mechanochemical synthesis of β-cyclodextrin polymers by twin screw extrusion
Source: PubMed Central journal article supplement (PMC8724137; doi:10.1007/s11356-021-15187-5), 2021-08-23

SEM ( $\beta$ NS-Citr 1:4 TSE)

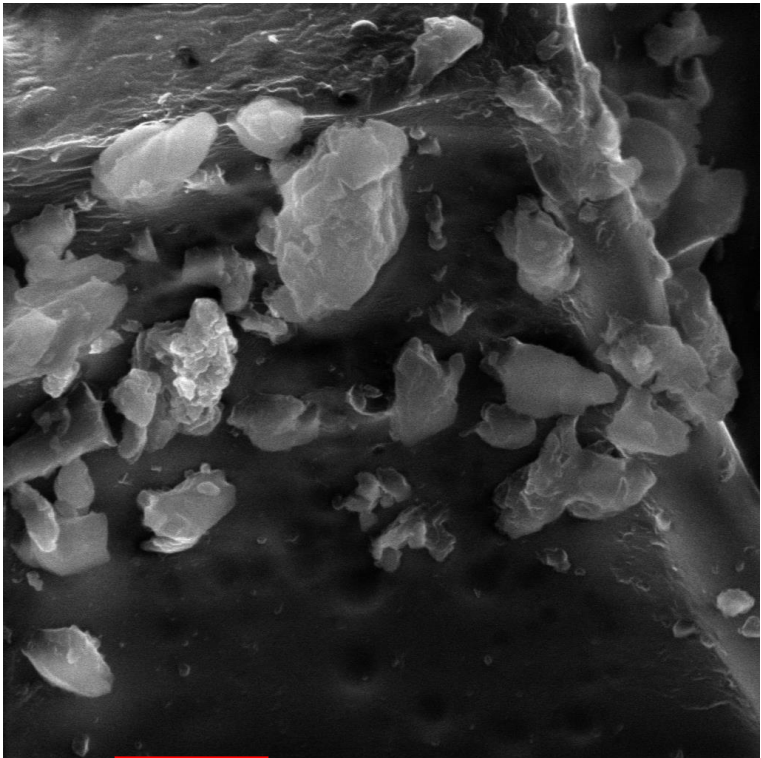

|           |                  |                           |              |           |
|-----------|------------------|---------------------------|--------------|-----------|
|           | Mag<br>20.0 kx   | FoV<br>14.2 $\mu$ m       | BC<br>100 pA | 2 $\mu$ m |
| Det<br>SE | Energy<br>10 keV | File Name<br>BNS 14TSE_01 |              |           |

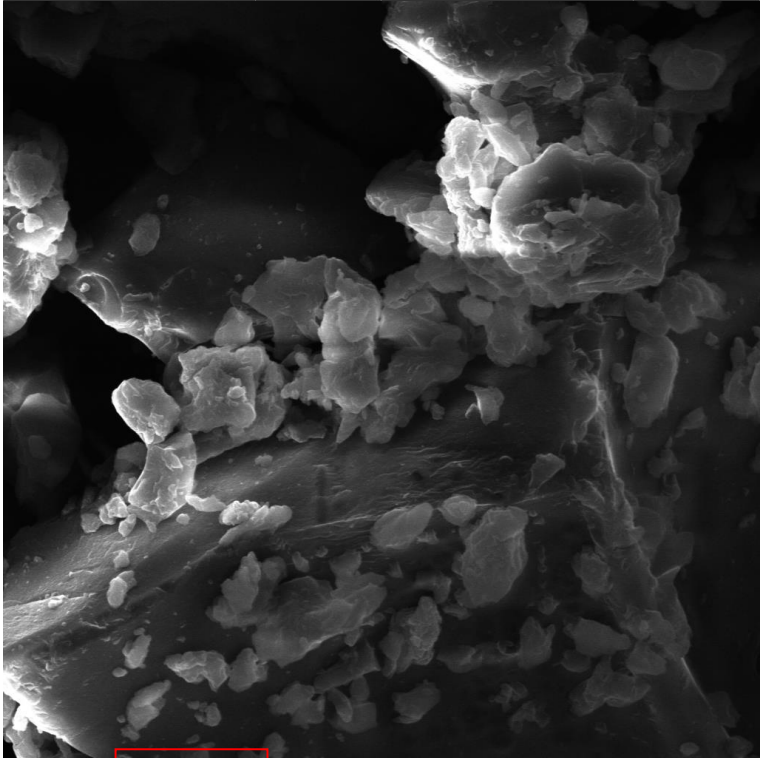

|           |                  |                           |              |           |
|-----------|------------------|---------------------------|--------------|-----------|
|           | Mag<br>10.0 kx   | FoV<br>28.3 $\mu$ m       | BC<br>100 pA | 5 $\mu$ m |
| Det<br>SE | Energy<br>10 keV | File Name<br>BNS 14TSE_02 |              |           |

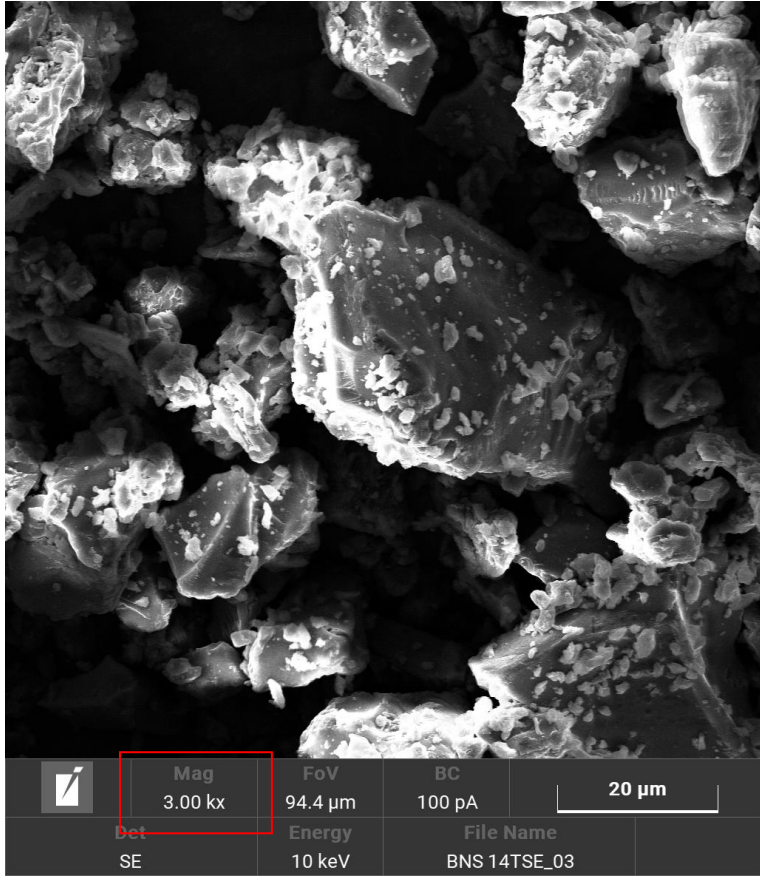

Supplement: 11356_2021_15187_MOESM1_ESM.pdf [file 11356_2021_15187_MOESM1_ESM.pdf]
